# Supplementary material for: ESI-MS mechanistic studies of Wacker oxidation of alkenes: dinuclear species as catalytic active intermediates
Source: Royal Society of Chemistry journal article supplement (doi:10.1039/c2ra01204a), 2012-01-01

# ESI–MS Mechanistic Studies of the Wacker Oxidation of Alkenes: Dinuclear Species as Catalytic Active Intermediates

Dominique Harakat, Jacques Muzart, Jean Le Bras\*

Institut de Chimie Moléculaire de Reims, UMR 7312, CNRS-Université de Reims Champagne-  
Ardenne, UFR des Sciences Exactes et Naturelles, BP 1039, 51687 REIMS Cedex 2, France

Fax: +33 3 26 91 31 66; E-mail: jean.lebras@univ-reims.fr

## Supporting Information

### Table of Contents

|                 |     |
|-----------------|-----|
| Figure S1 ..... | S2  |
| Figure S2 ..... | S2  |
| Figure S3 ..... | S3  |
| Figure S4 ..... | S4  |
| Figure S5 ..... | S5  |
| Figure S6 ..... | S5  |
| Figure S7 ..... | S6  |
| Figure S8 ..... | S8  |
| Figure S9 ..... | S10 |

**Figure S1.** ESI(+)-MS of a mixture of PdCl<sub>2</sub>, BQ, DMF, and H<sub>2</sub>O.<sup>a</sup>

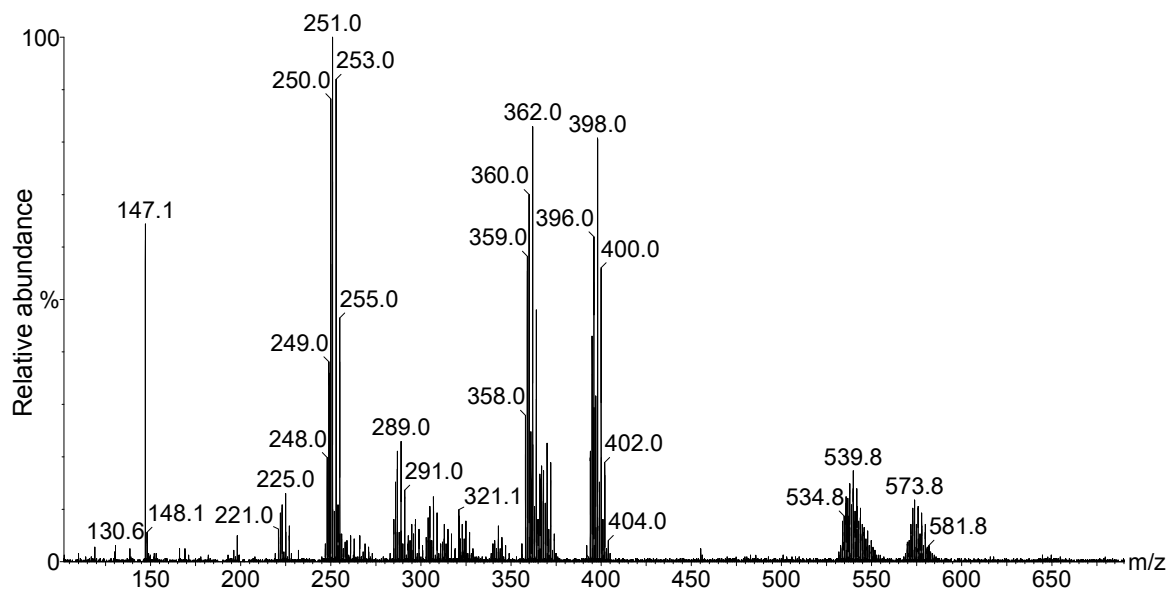

<sup>a</sup> PdCl<sub>2</sub> (0.05 mmol), BQ (1.1 mmol), DMF (1.75 mL), H<sub>2</sub>O (0.25 mL).

**Figure S2.** ESI(+)-MS of the reaction solution of the oxydation of **1c** over 24h.<sup>a</sup>

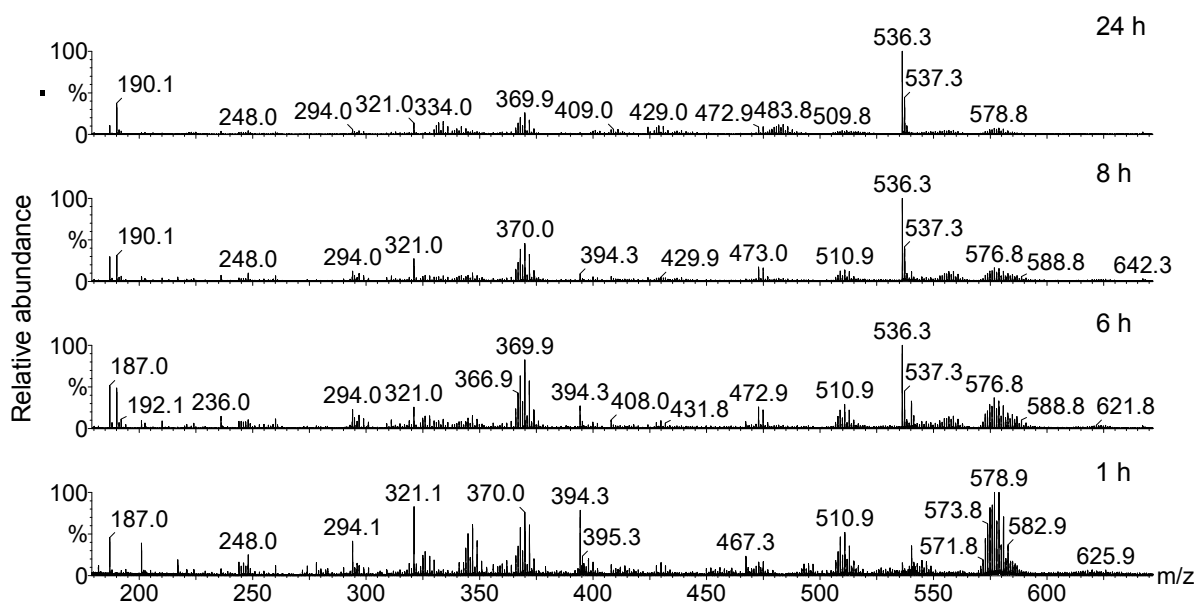

<sup>a</sup> **1c** (1.0 mmol), PdCl<sub>2</sub> (0.05 mmol), BQ (1.1 mmol), DMF (1.75 mL), H<sub>2</sub>O (0.25 mL).

**Figure S3.** ESI(-)-MS/MS (6-8 eV) of  $[\text{Pd}_2\text{Cl}_5(\mathbf{1f})]^-$  and  $[\text{Pd}_2\text{Cl}_5(\mathbf{2f})]^-$ .

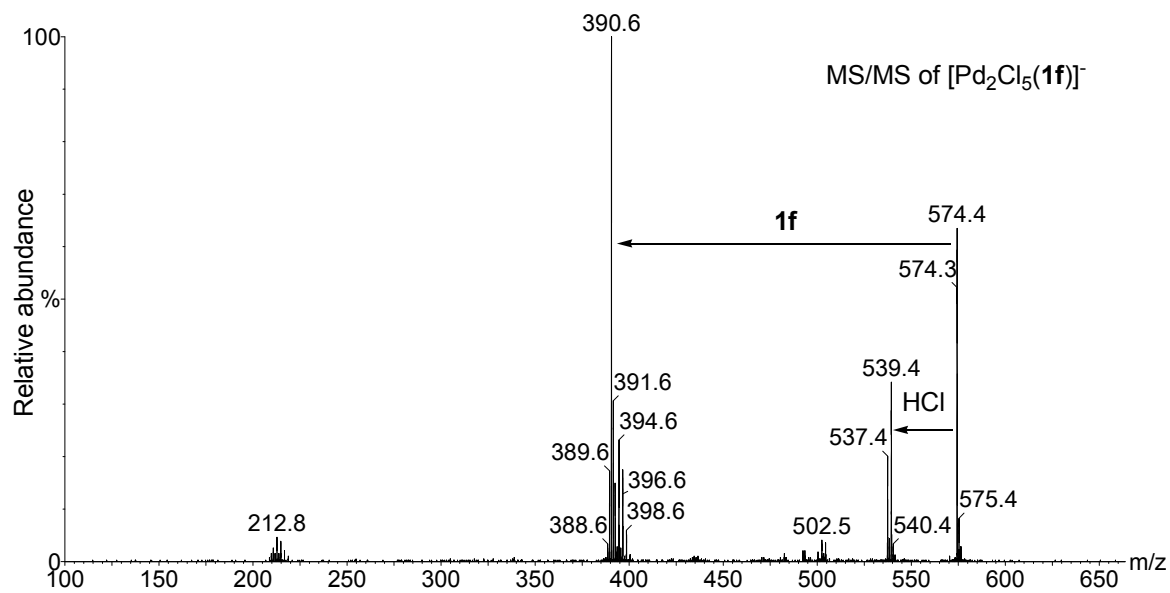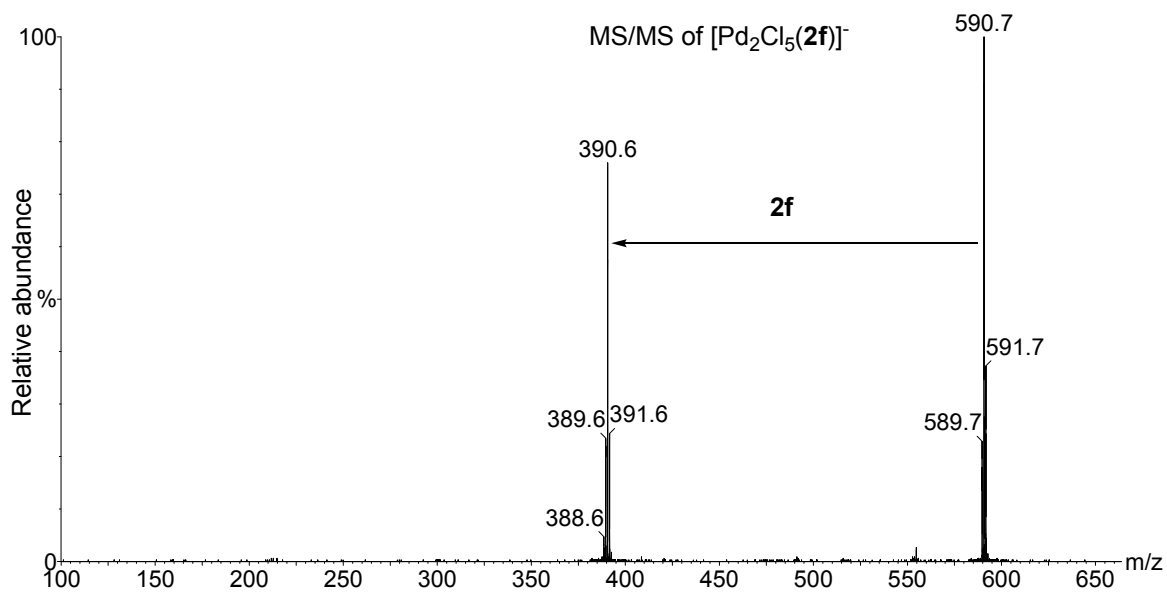

**Figure S4.** ESI(-)-MS/MS (6-8 eV) of  $[\text{Pd}_2\text{Cl}_5(\mathbf{1e})]^-$  and  $[\text{Pd}_2\text{Cl}_5(\mathbf{2e})]^-$  showing the loss of  $\text{H}_2\text{O}$  and  $\text{HCl}$ .

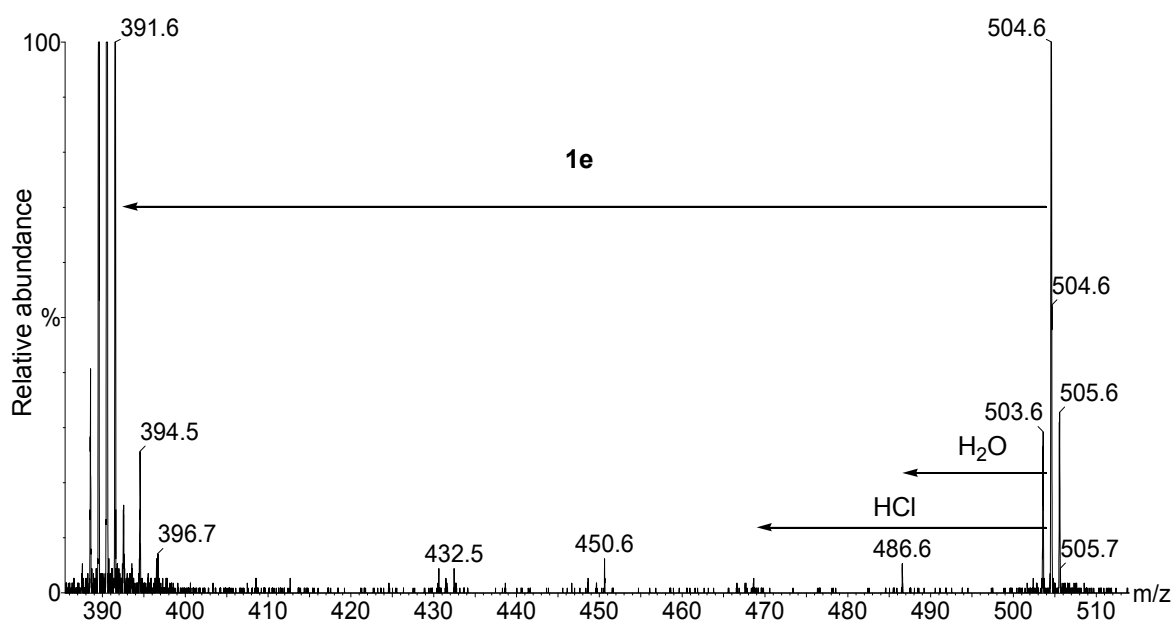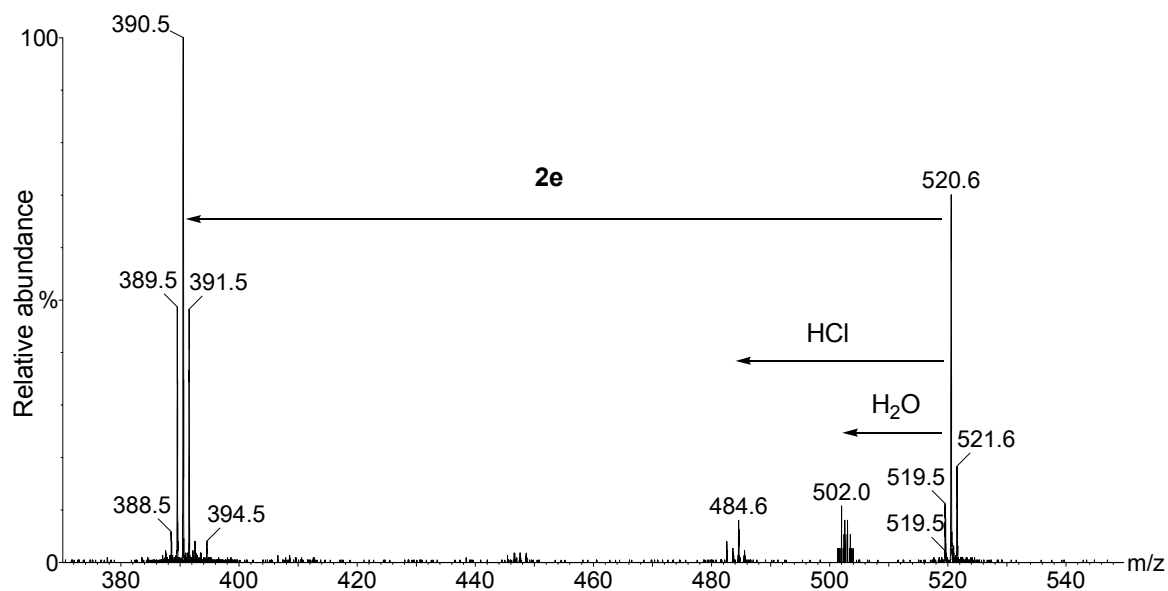

**Figure S5.** Isotopic distribution of  $[\text{Pd}_2\text{Cl}_5(\mathbf{1e})]^-$ ,  $[\text{Pd}_2\text{Cl}_4(\text{H}_2\text{O})(\text{OH})(\mathbf{1e})]^-$  and experimental spectra.

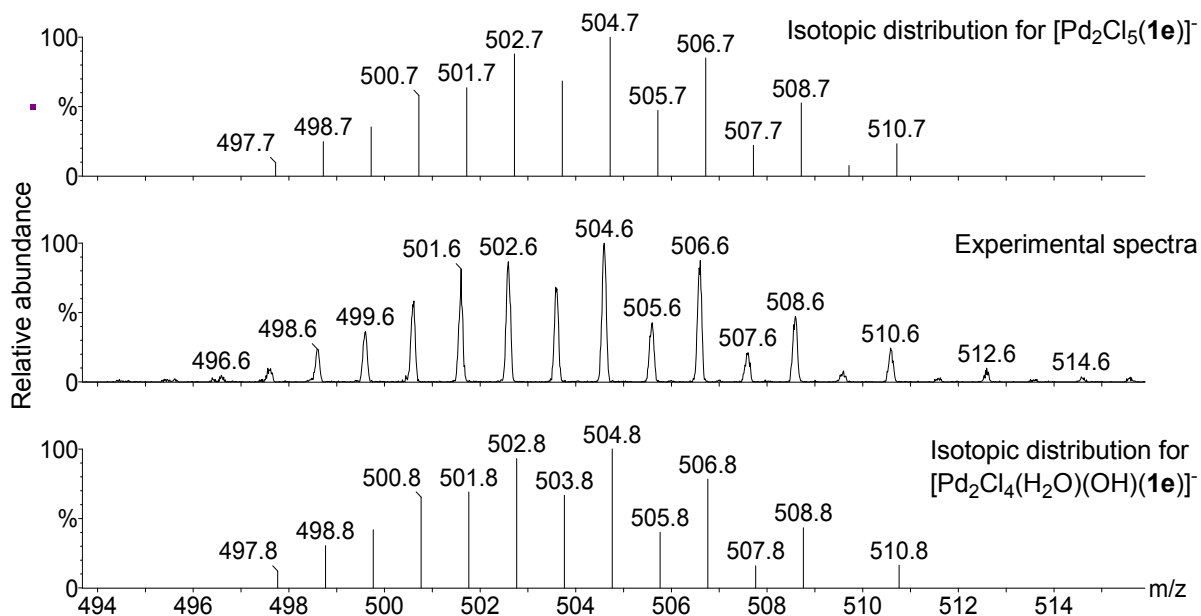

**Figure S6.** ESI(-)-MS/MS (15-20 eV) of  $[\text{Pd}_2\text{Cl}_4(\mathbf{1f-H})]^-$  and  $[\text{Pd}_2\text{Cl}_4(\mathbf{2f-H})]^-$ .

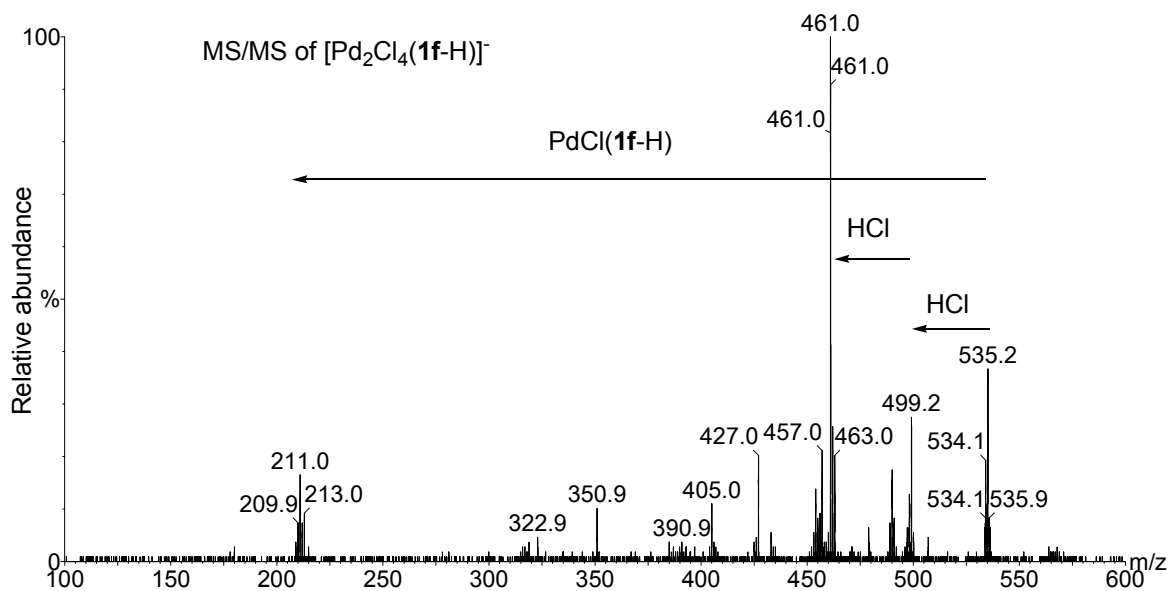

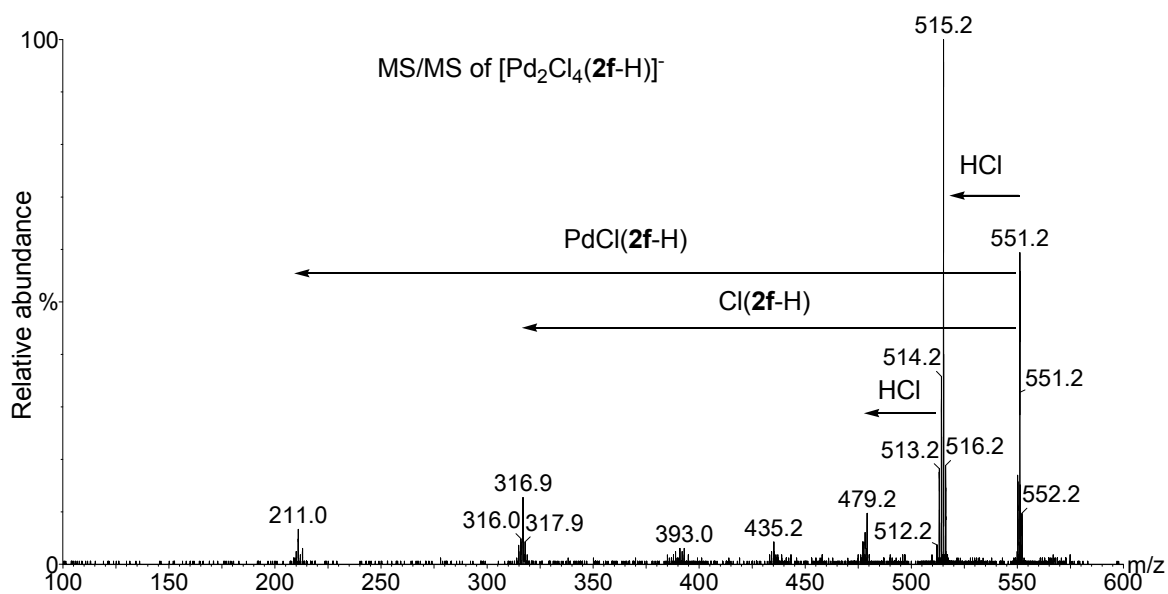

**Figure S7.** ESI(-)-MS of the reaction solution of the oxidation of **1a-1d** after 10 min.

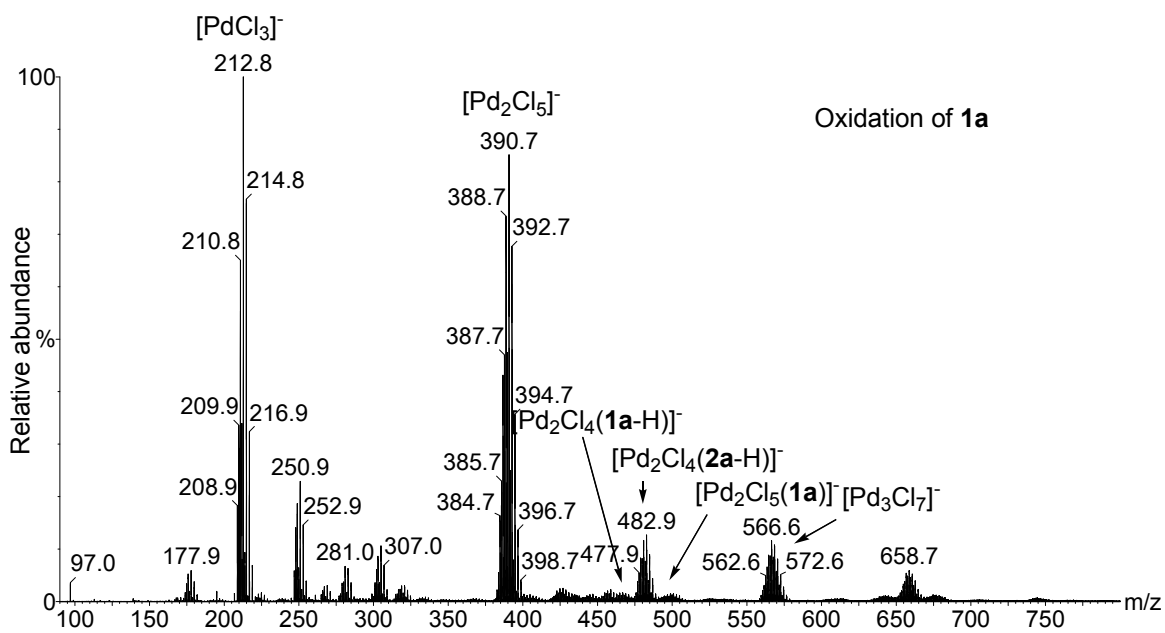

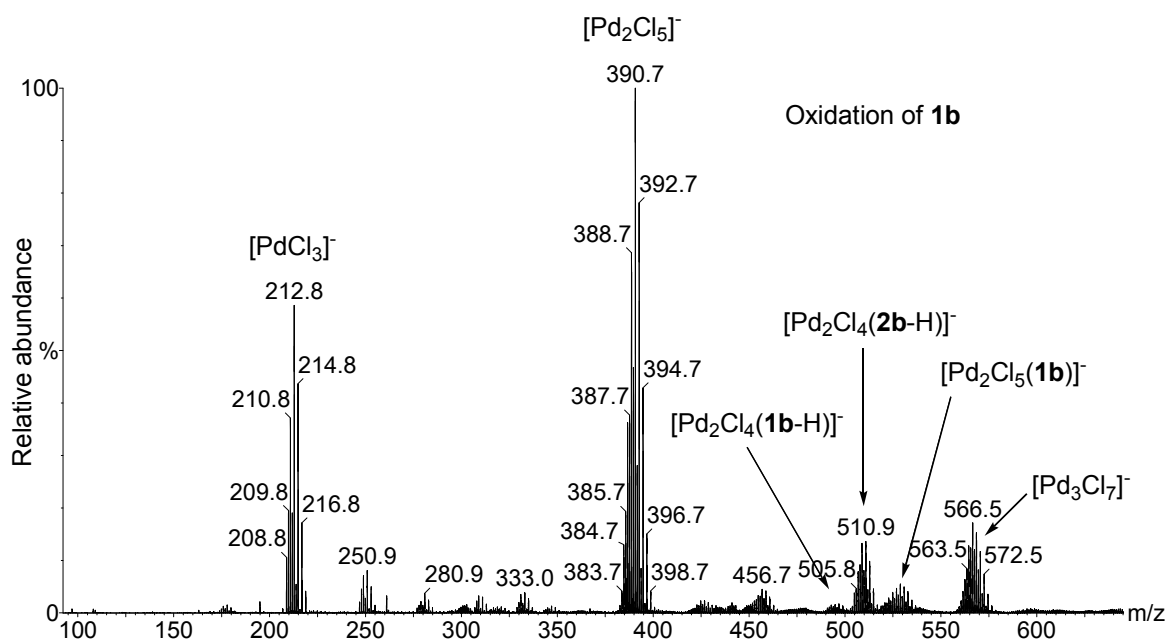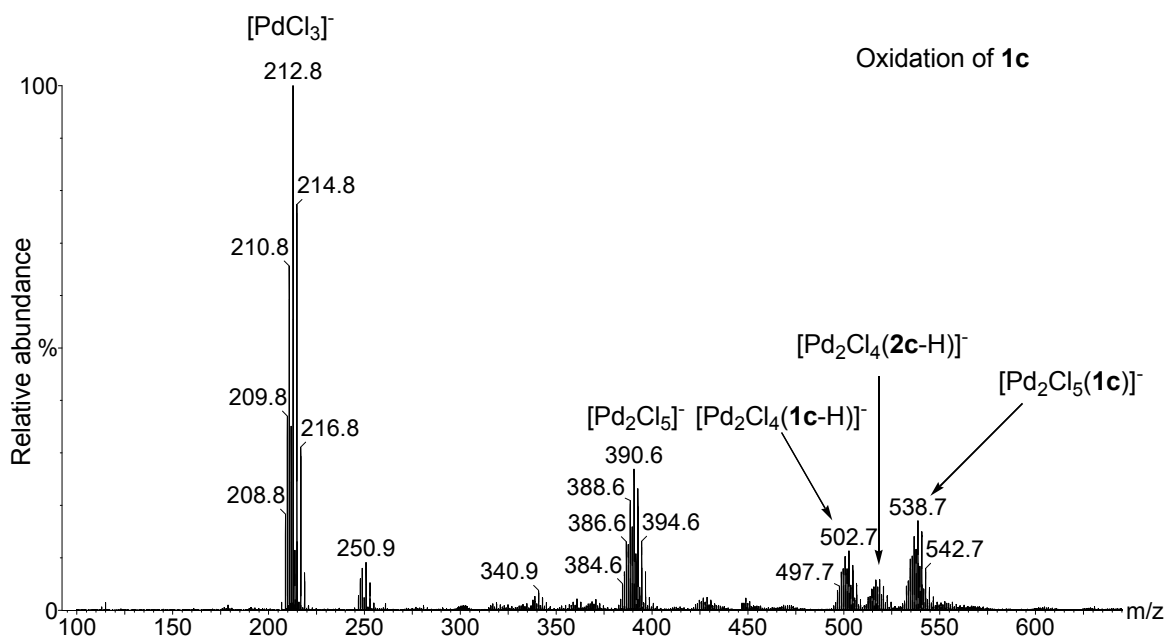

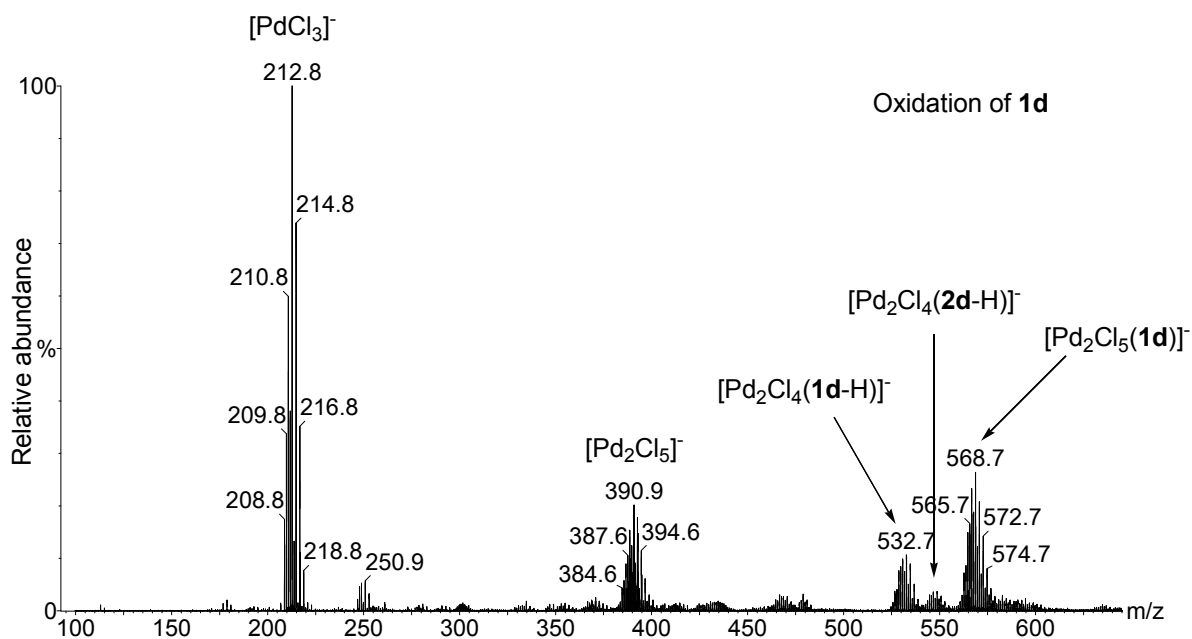

**Figure S8.** ESI(-)-MS/MS (6-8 eV) of  $[\text{Pd}_2\text{Cl}_5(\mathbf{1b})]^-$ ,  $[\text{Pd}_2\text{Cl}_5(\mathbf{1c})]^-$ , and  $[\text{Pd}_2\text{Cl}_5(\mathbf{1d})]^-$ .

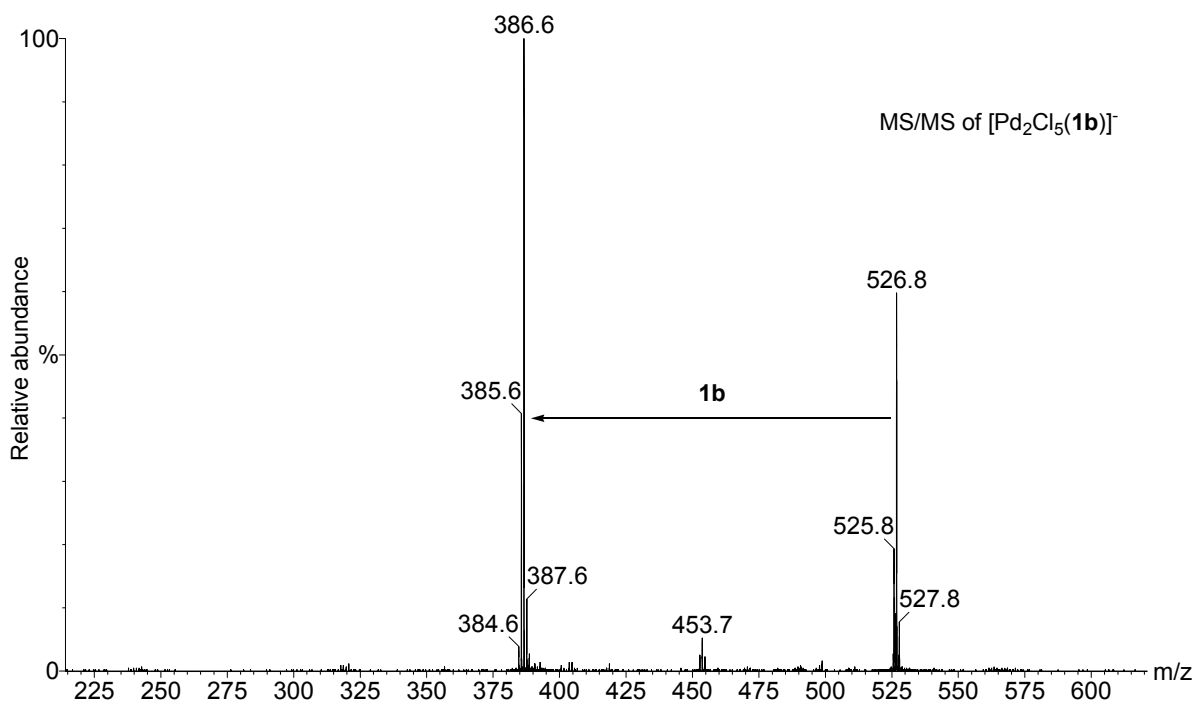



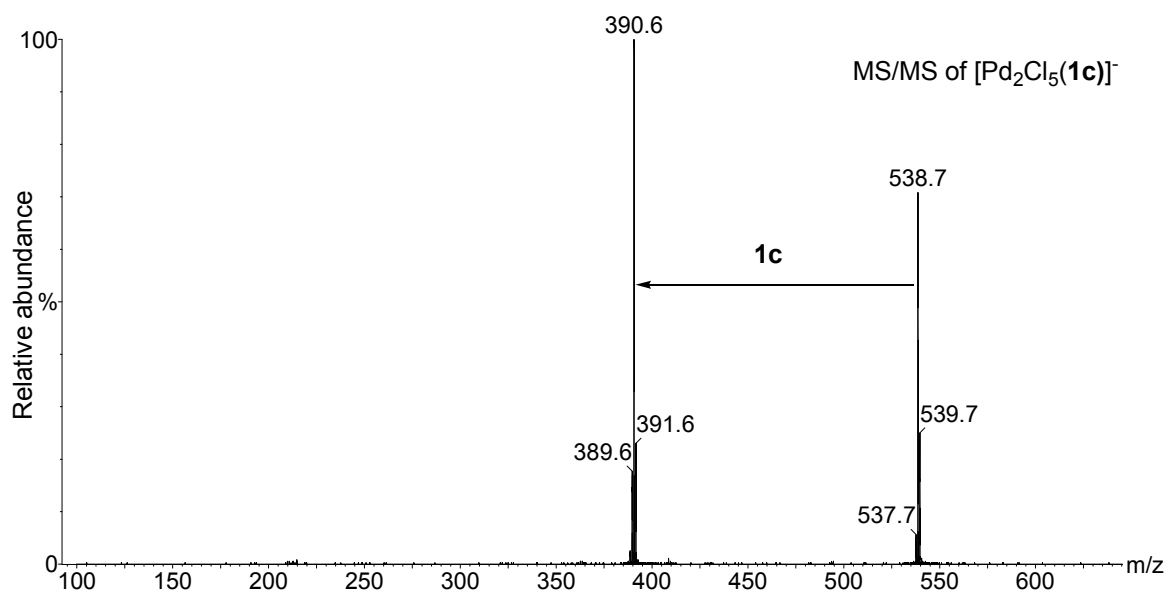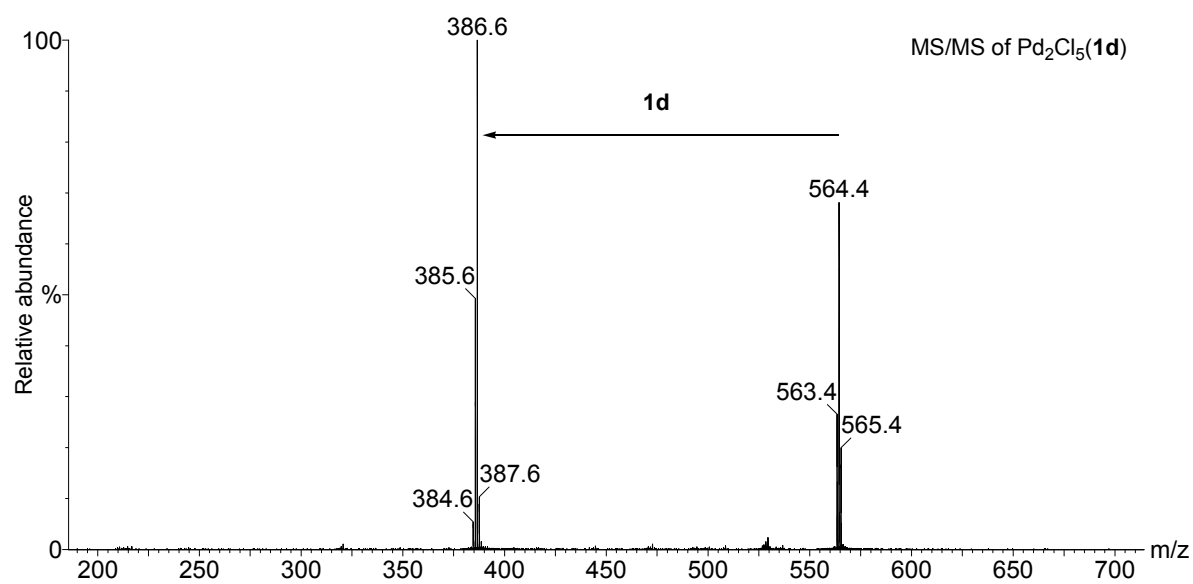



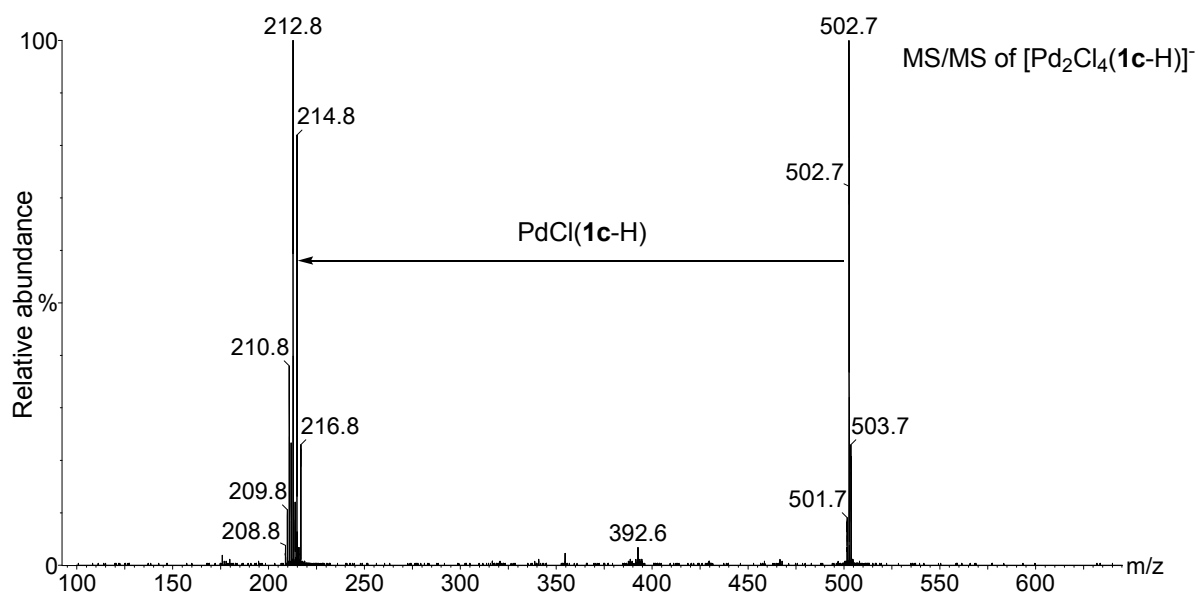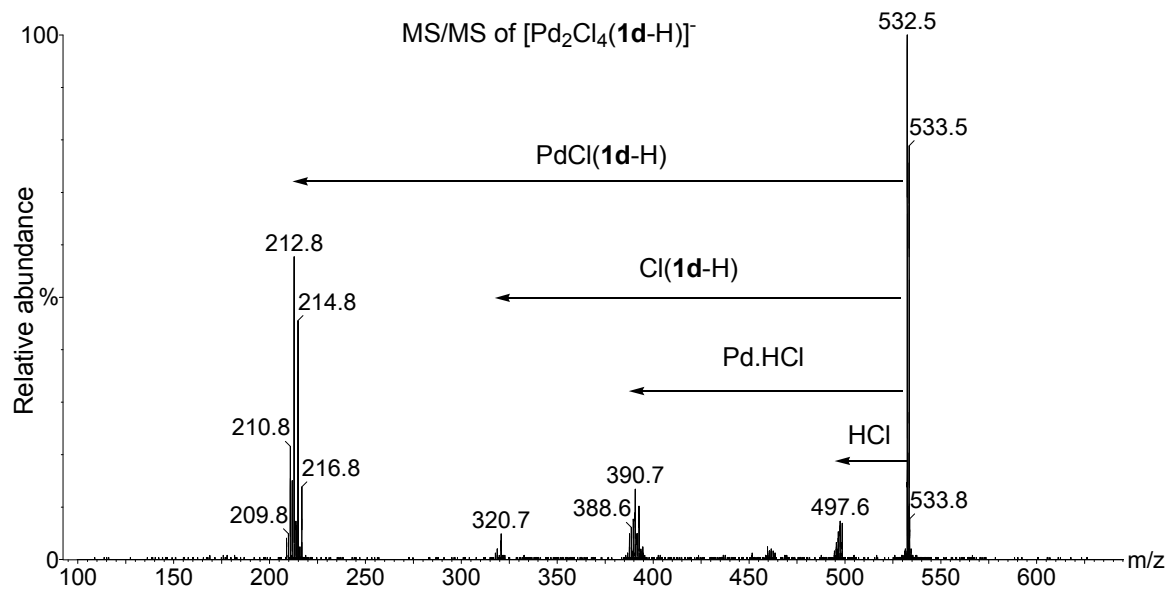

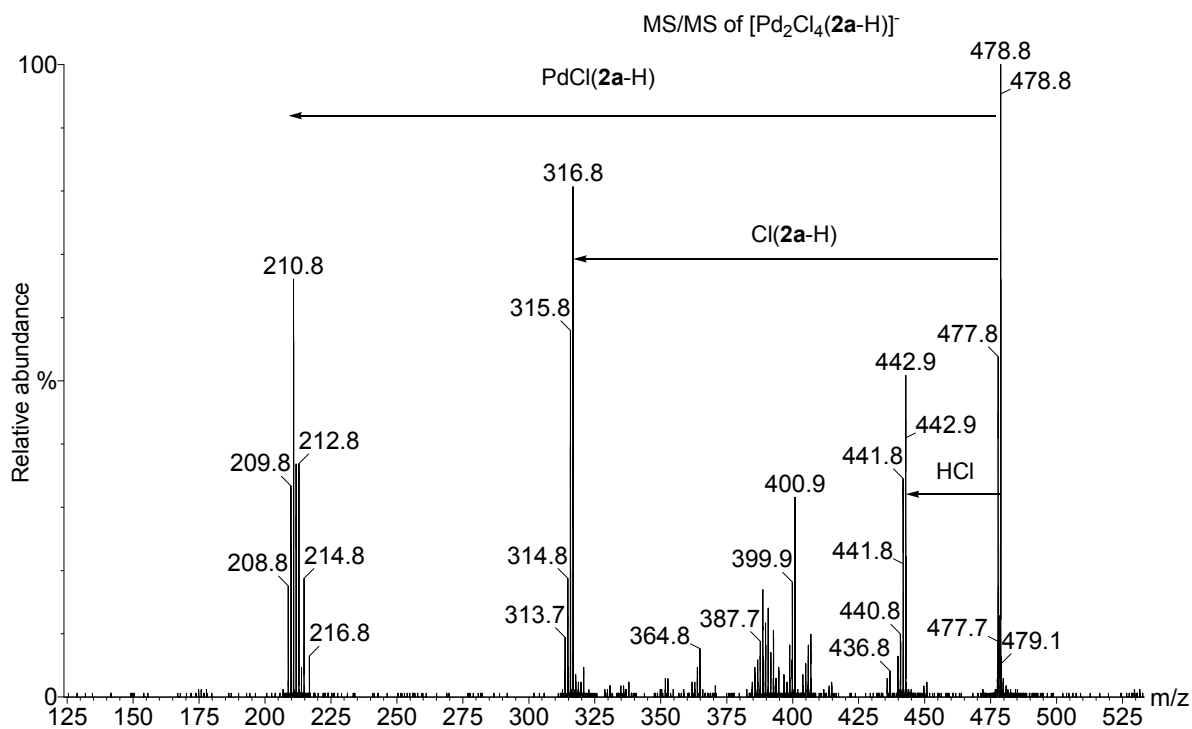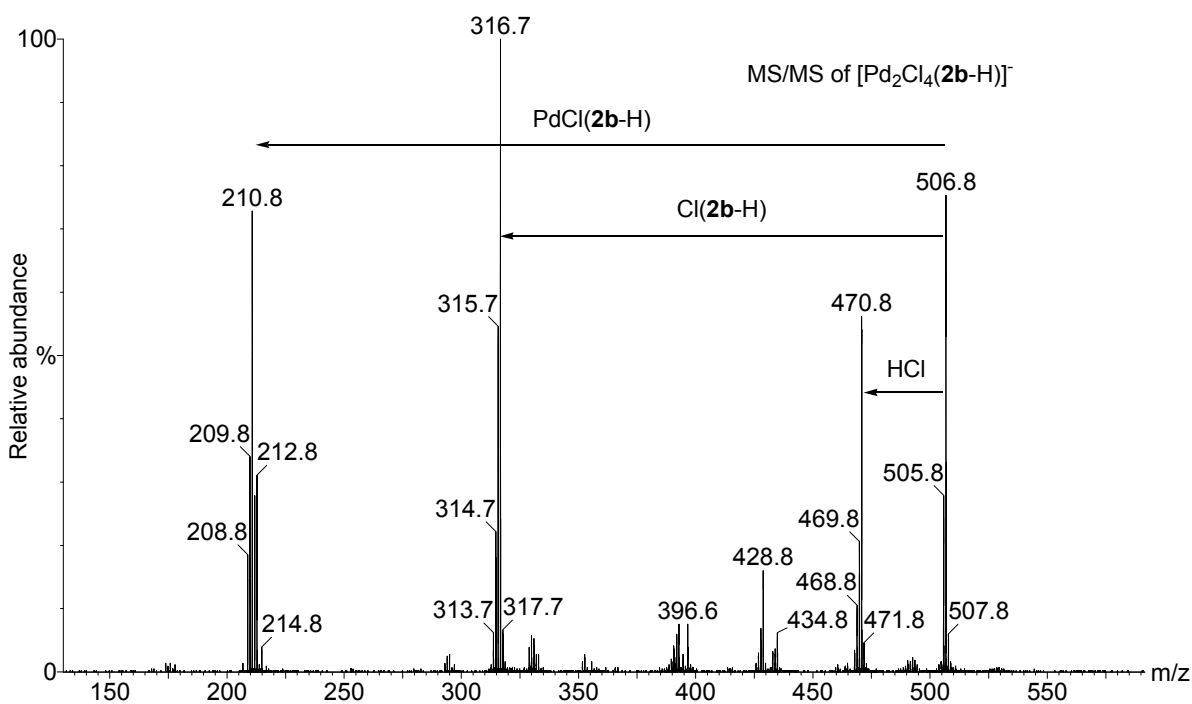

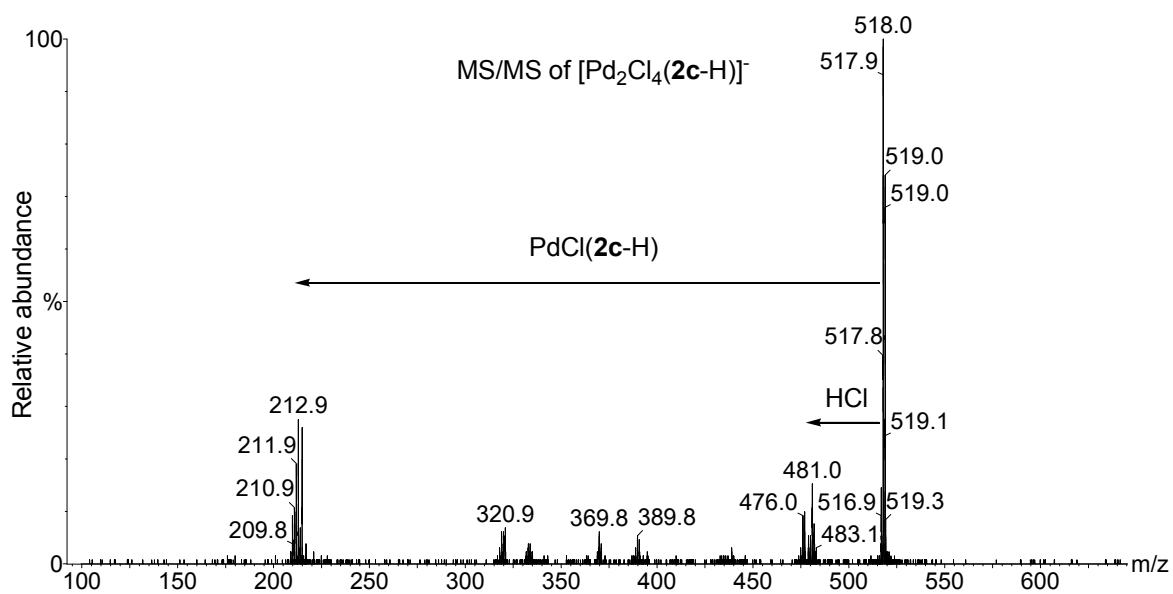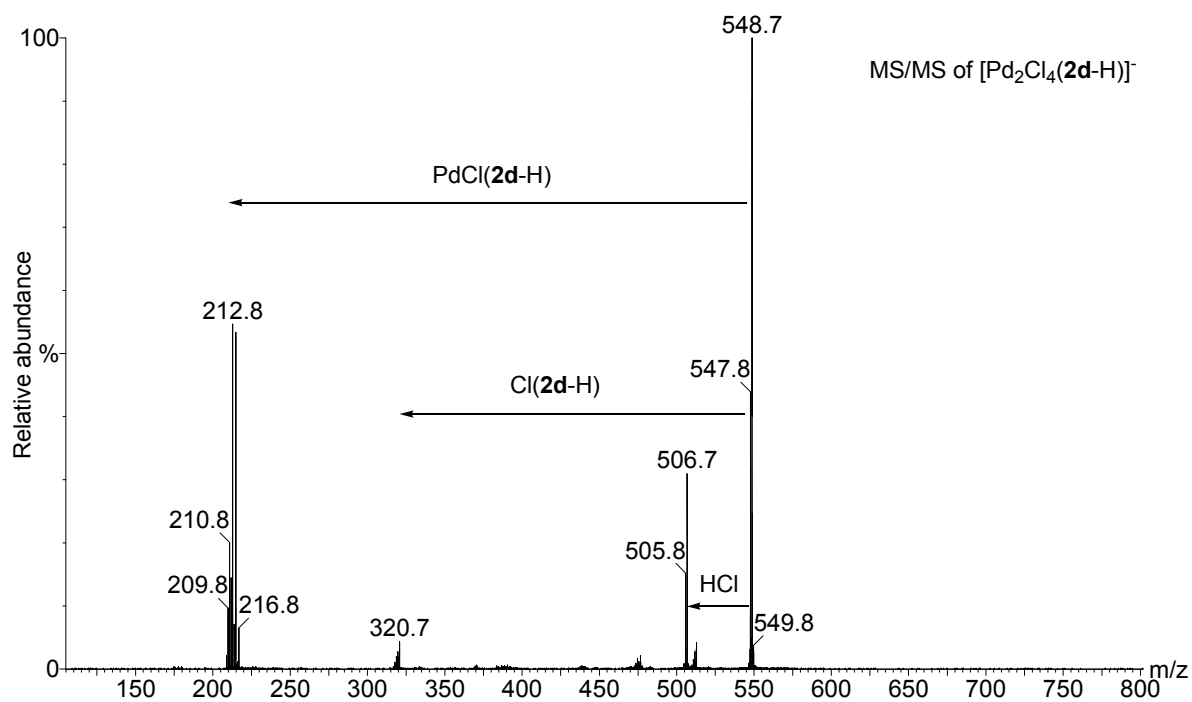

Supplement: c2ra01204a.pdf [file c2ra01204a.pdf]
